# Supplementary material for: Norepinephrine and its metabolites are involved in the synthesis of neuromelanin derived from the locus coeruleus
Source: PubMed Central journal article supplement — J Neurochem. 2015 Sep 4;135(4):768–76. doi: 10.1111/jnc.13237 (PMC5014224; doi:10.1111/jnc.13237), 2015-09-04
Supplement: JNC-135-768-s001.pdf [file JNC-135-768-s001.pdf]

Norepinephrine and its metabolites are involved in the synthesis of neuromelanin derived from the *locus coeruleus*

Kazumasa Wakamatsu, Keisuke Tabuchi, Makoto Ojika, Fabio A. Zucca, Luigi Zecca and Shosuke Ito

## Supporting information

Additional Supporting Information may be found in the online version of this article.

**Figure S1.**  $^1\text{H}$ -NMR spectra of CMT-DA.

**Figure S2.**  $^{13}\text{C}$ -NMR spectra of CMT-DA.

**Figure S3.** HRMS spectra of CMT-DA.

**Figure S4.**  $^1\text{H}$ -NMR spectra of 5-*S*-Cys-CMT-DA.

**Figure S5.**  $^{13}\text{C}$ -NMR spectra of 5-*S*-Cys-CMT-DA.

**Figure S6.** HRMS spectra of 5-*S*-Cys-CMT-DA.

**Figure S7.** 5-*S*-Cys-CMT-DA by Ion Trap LC-MS

**Figure S8.** LC-NM by Ion Trap LC-MS

**Figure S9.** Proposed mechanism for the production of CMT-DA by hydrolysis of NE with 6 M HCl in the presence of thioglycolic acid. DA-thioether derivative CMT-DA may be produced from NE via the quinonemethide intermediate.

As a service to our authors and readers, this journal provides supporting information supplied by the authors. Such materials are peer-reviewed and may be re-organized for online delivery, but are not copy-edited or typeset. Technical support issues arising from supporting information (other than missing files) should be addressed to the authors.

wakamatsu\_Cl-DA, 0.5 mL 0.1 M DCl

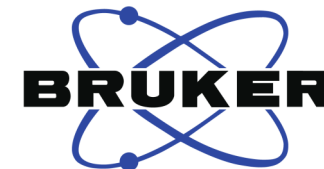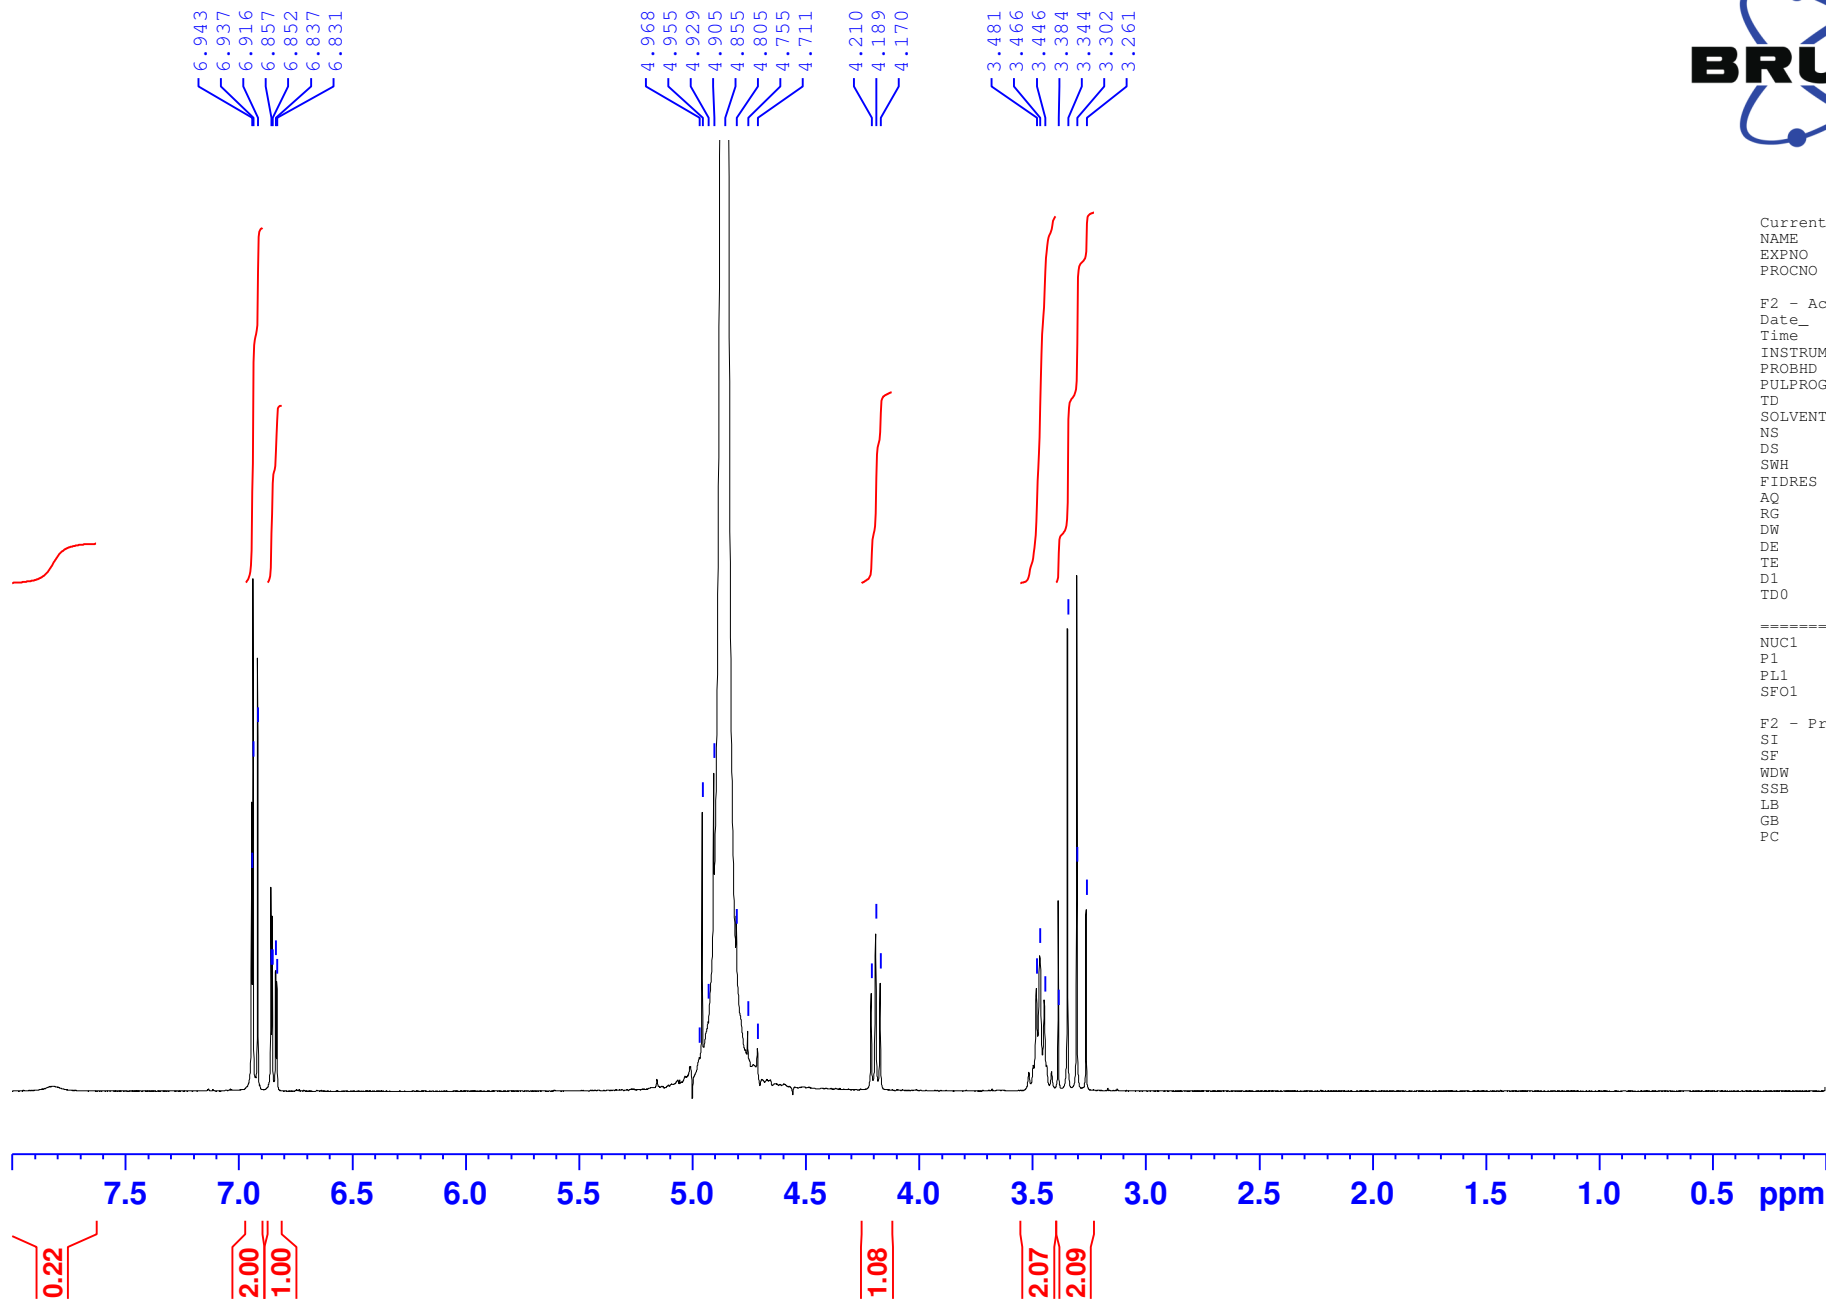

Current Data Parameters  
NAME ojika  
EXPNO 5  
PROCNO 1

F2 - Acquisition Parameters  
Date\_ 20140811  
Time 12.55  
INSTRUM spect  
PROBHD 5 mm QNP 1H/13  
PULPROG zg30  
TD 65536  
SOLVENT D2O  
NS 16  
DS 2  
SWH 8278.146 Hz  
FIDRES 0.126314 Hz  
AQ 3.9583745 sec  
RG 35.9  
DW 60.400 usec  
DE 6.50 usec  
TE 297.2 K  
D1 1.00000000 sec  
TD0 1

===== CHANNEL f1 =====  
NUC1 1H  
P1 15.00 usec  
PL1 10.30 dB  
SFO1 400.1324710 MHz

F2 - Processing parameters  
SI 32768  
SF 400.1299458 MHz  
WDW EM  
SSB 0  
LB 0.30 Hz  
GB 0  
PC 1.00

Fig. S1

wakamatsu\_Cl-DA, 0.5 mL 0.1 M DCl

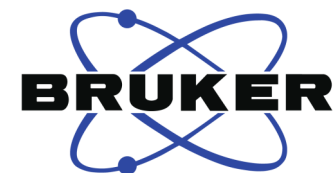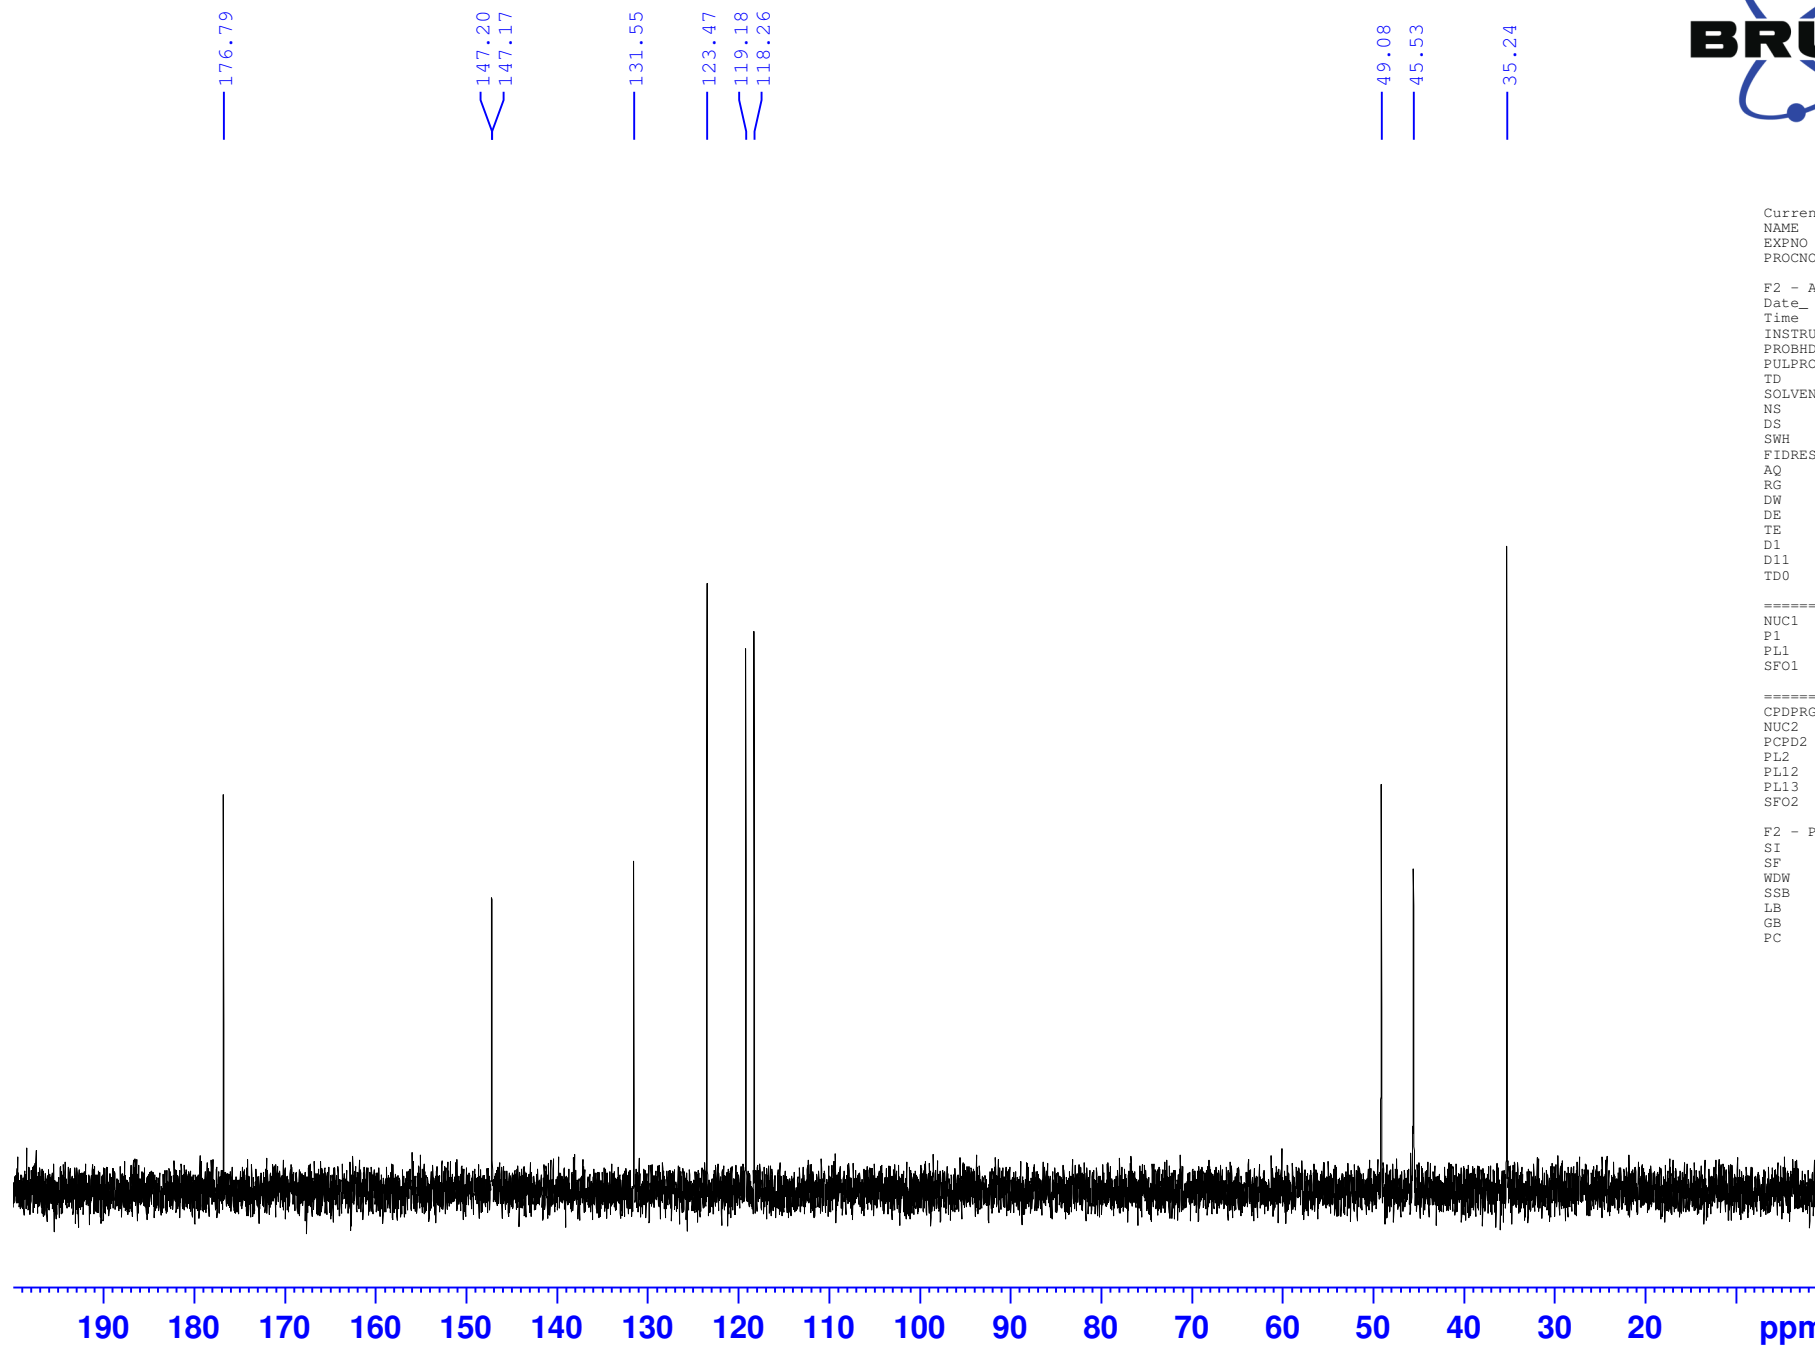

```
Current Data Parameters
NAME      ojika
EXPNO     6
PROCNO    1

F2 - Acquisition Parameters
Date_     20140811
Time      12.59
INSTRUM   spect
PROBHD    5 mm QNP 1H/13
PULPROG   zgpg30
TD         65536
SOLVENT   D2O
NS         1136
DS         4
SWH        23980.814 Hz
FIDRES     0.365918 Hz
AQ         1.3664256 sec
RG         4096
DW         20.850 usec
DE         6.50 usec
TE         297.2 K
D1         2.0000000 sec
D11        0.0300000 sec
TD0        1

===== CHANNEL f1 =====
NUC1       13C
P1         12.00 usec
PL1        7.50 dB
SFO1       100.6228298 MHz

===== CHANNEL f2 =====
CPDPRG[2] waltz16
NUC2       1H
PCPD2      80.00 usec
PL2        10.30 dB
PL12       25.00 dB
PL13       25.00 dB
SFO2       400.1316005 MHz

F2 - Processing parameters
SI         32768
SF         100.6124937 MHz
WDW        EM
SSB        0
LB         1.00 Hz
GB         0
PC         1.40
```

Fig. S2

Mariner Spec (40:42 (T /3.49:3.66) -13:17 (T -3.49:3.66) -79:82 (T -0.00:0.00) ASC[BP = 244.1, 1090]

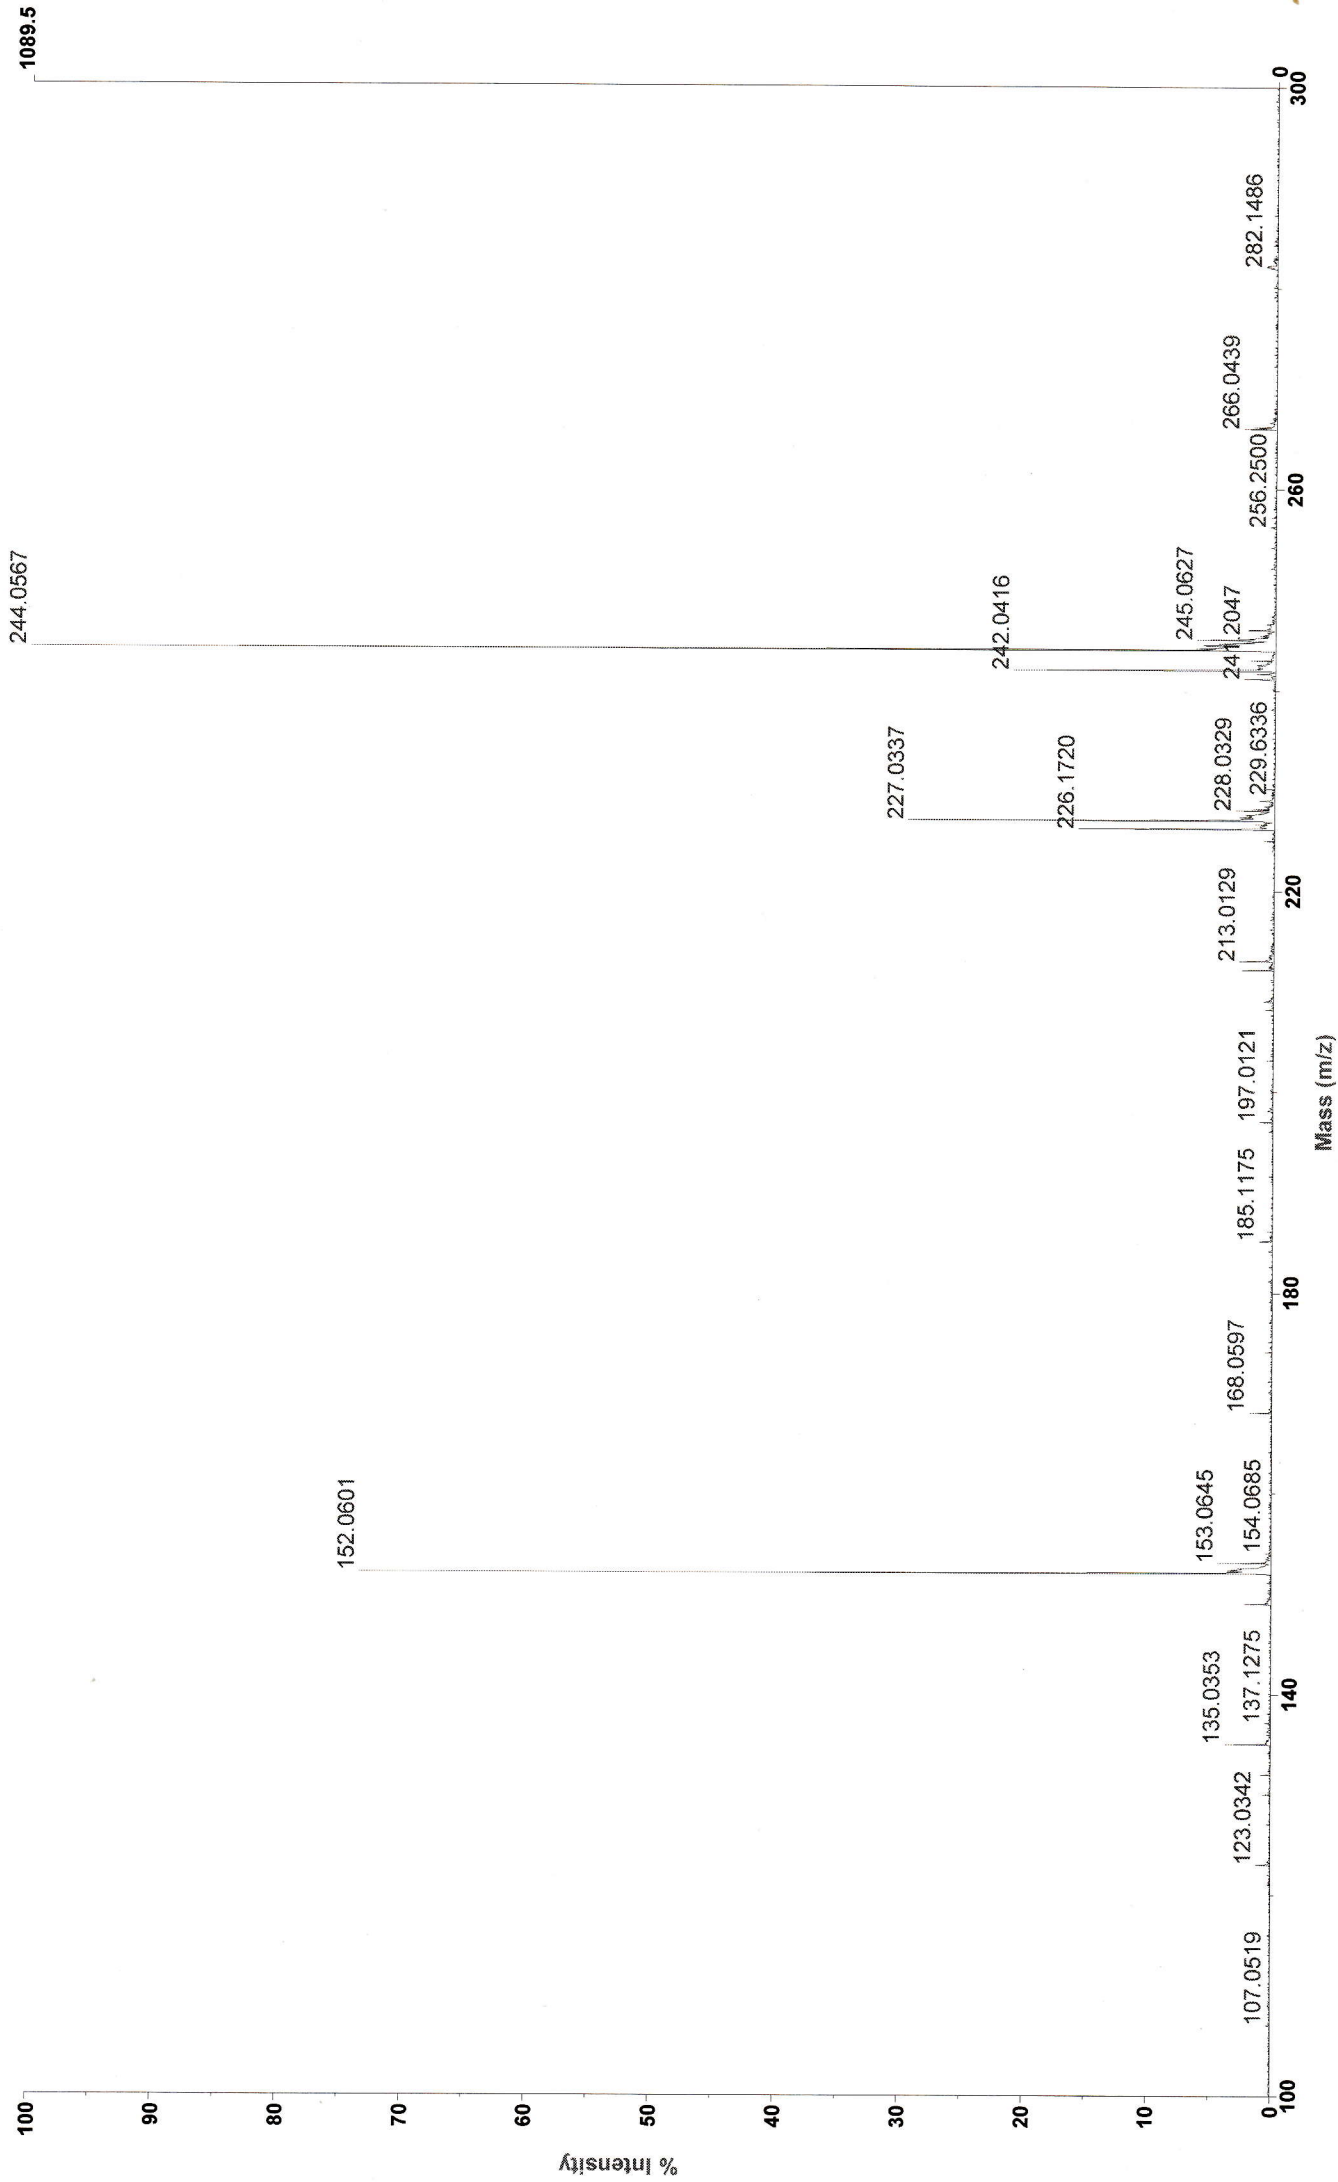

10 uM, 50% MeCN-0.1% HCOOH  
J:\...CI-DA002.dat  
Acquired: Aug 11 13:24:00 2014

Fig. S3

5S-CNE\_HCl/D2O-0.1M DCl

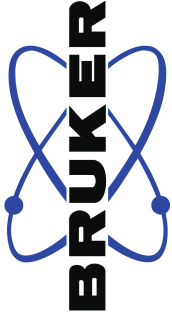

7.125  
7.119  
7.105  
7.099  
7.004  
6.989  
6.984  
4.255  
4.251  
4.244  
4.239  
4.235  
4.228  
4.223  
4.202  
4.182  
3.576  
3.575  
3.560  
3.559  
3.537  
3.521  
3.504  
3.496  
3.493  
3.484  
3.466  
3.458  
3.455  
3.446

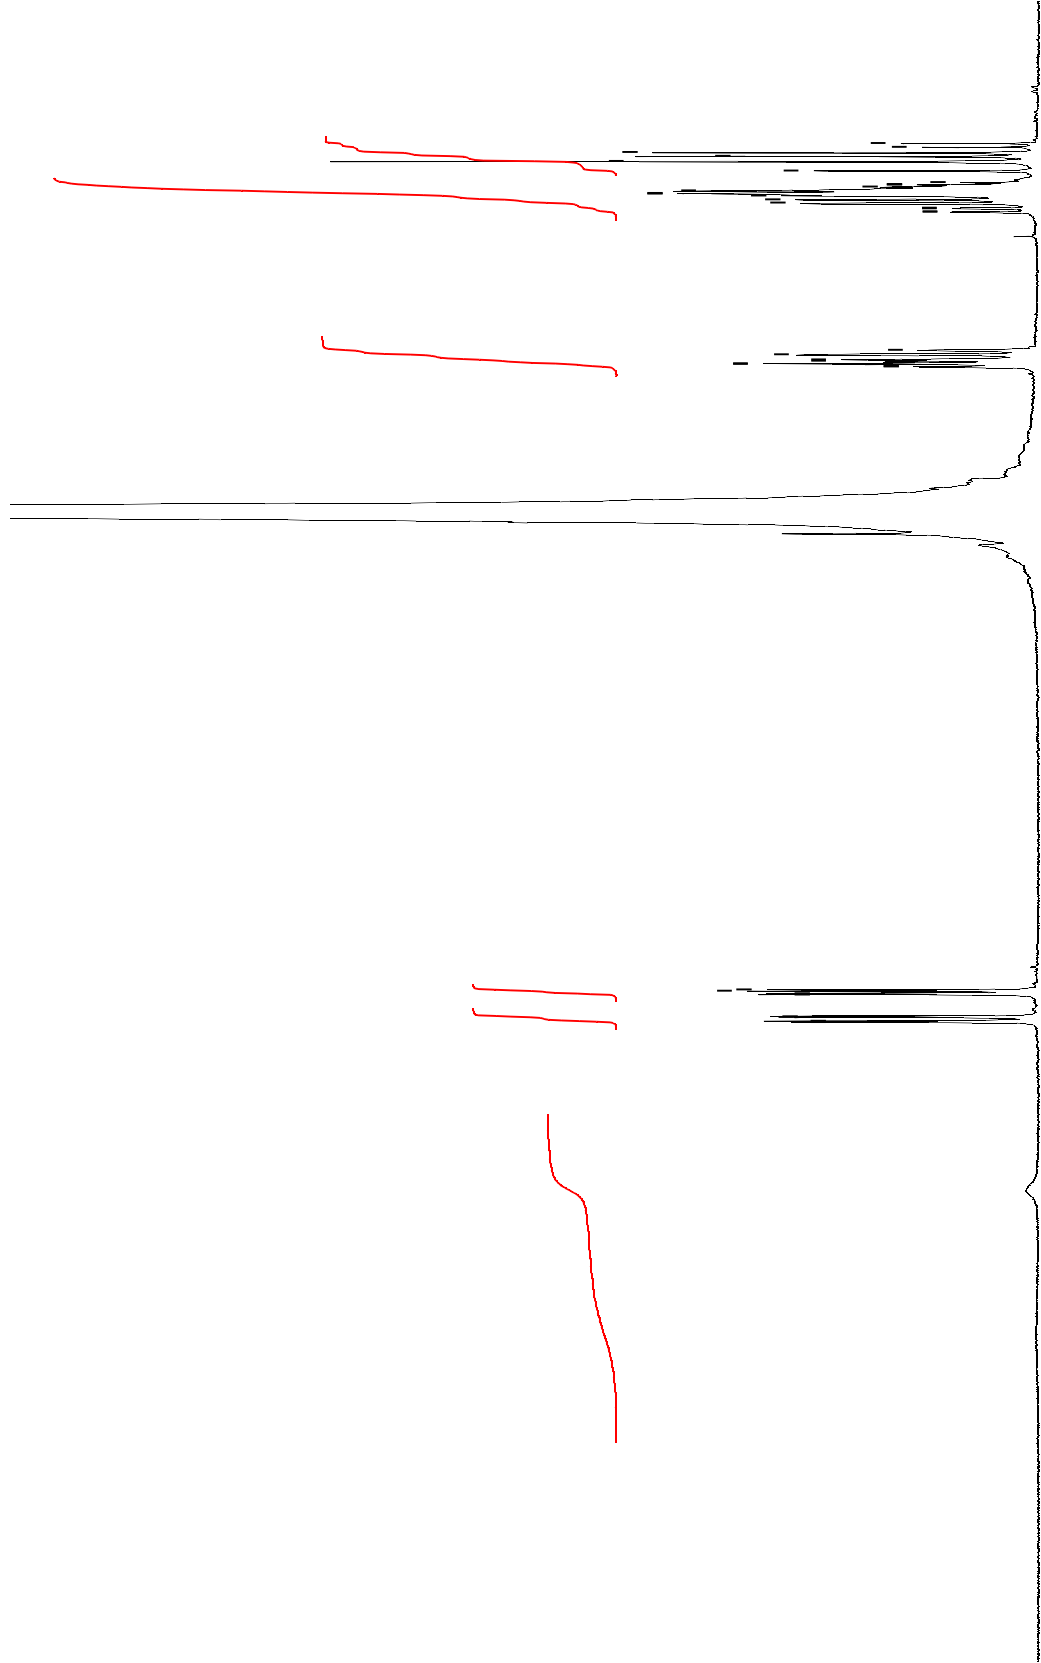

Current Data Parameters  
NAME oj1ka\_1ral  
EXPNO 1  
PROCNO 1

F2 - Acquisition Parameters  
Date\_ 20141024  
Time\_ 9.51  
INSTRUM spect  
PROBHD 5 mm QNP 1H/13  
PULPROG zgpg30  
TD 65536  
SOLVENT D2O  
NS 16  
DS 2  
SWH 8278.146 Hz  
FIDRES 0.1126314 Hz  
AQ 3.9583745 sec  
RG 35.9  
DM 60.400 usec  
DE 6.50 usec  
TE 296.2 K  
D1 1.00000000 sec  
TD0 1

==== CHANNEL f1 =====  
NUC1 1H  
P1 15.00 usec  
PL1 10.30 dB  
SFO1 400.1324710 MHz

F2 - Processing parameters  
SI 32768  
SF 400.1299342 MHz  
WDW EM  
SSB 0  
LB 0.30 Hz  
GB 0  
PC 1.00

Fig. S4

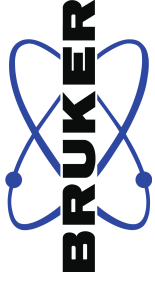

176.71  
176.68  
172.74  
172.69

148.62  
148.58  
147.78  
147.66

131.78  
131.74  
128.81  
128.48  
120.95  
120.87  
119.30  
118.83

54.71  
48.97  
48.92  
45.40  
45.31  
36.44  
36.33  
35.19

```

Current Data Parameters
NAME      ojika_irai
EXPNO    2
PROCNO   1

F2 - Acquisition Parameters
Date_    20141024
Time     12.04
INSTRUM  spect
PROBHD   5 mm QNP 1H/13
PULPROG  zgpg30
TD        65536
SOLVENT  D2O
NS        2308
DS        2
SWH       23980.814 Hz
FIDRES    0.365918 Hz
AQ        1.3664256 sec
RG        18390.4
DW        20.850 usec
DE        6.50 usec
TE        297.2 K
D1        2.00000000 sec
D11       0.03000000 sec
TD0       1

===== CHANNEL f1 =====
NUC1      13C
P1        12.00 usec
PL1       7.50 dB
SFO1      100.6228298 MHz

===== CHANNEL f2 =====
CPDPRG[2  waltz16
NUC2      1H
PCPD2     80.00 usec
PL2       10.30 dB
PL12      25.00 dB
PL13      25.00 dB
SFO2      400.1316005 MHz

F2 - Processing parameters
SI        32768
SF        100.6124938 MHz
WDW       EM
SSB       0
LB        1.00 Hz
GB        0
PC        1.40
    
```

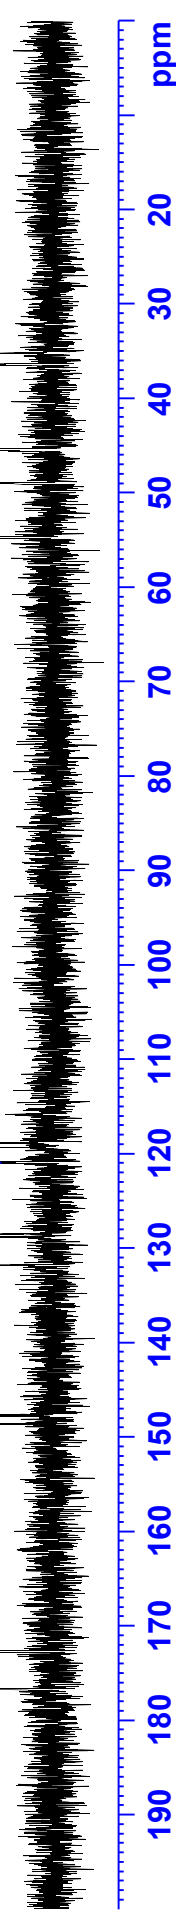

Fig. S5

Mariner Spec /138:145 (T /12.24:12.86) -154:165 (T -12.24:12.86) ASC[BP = 363.1, 536]

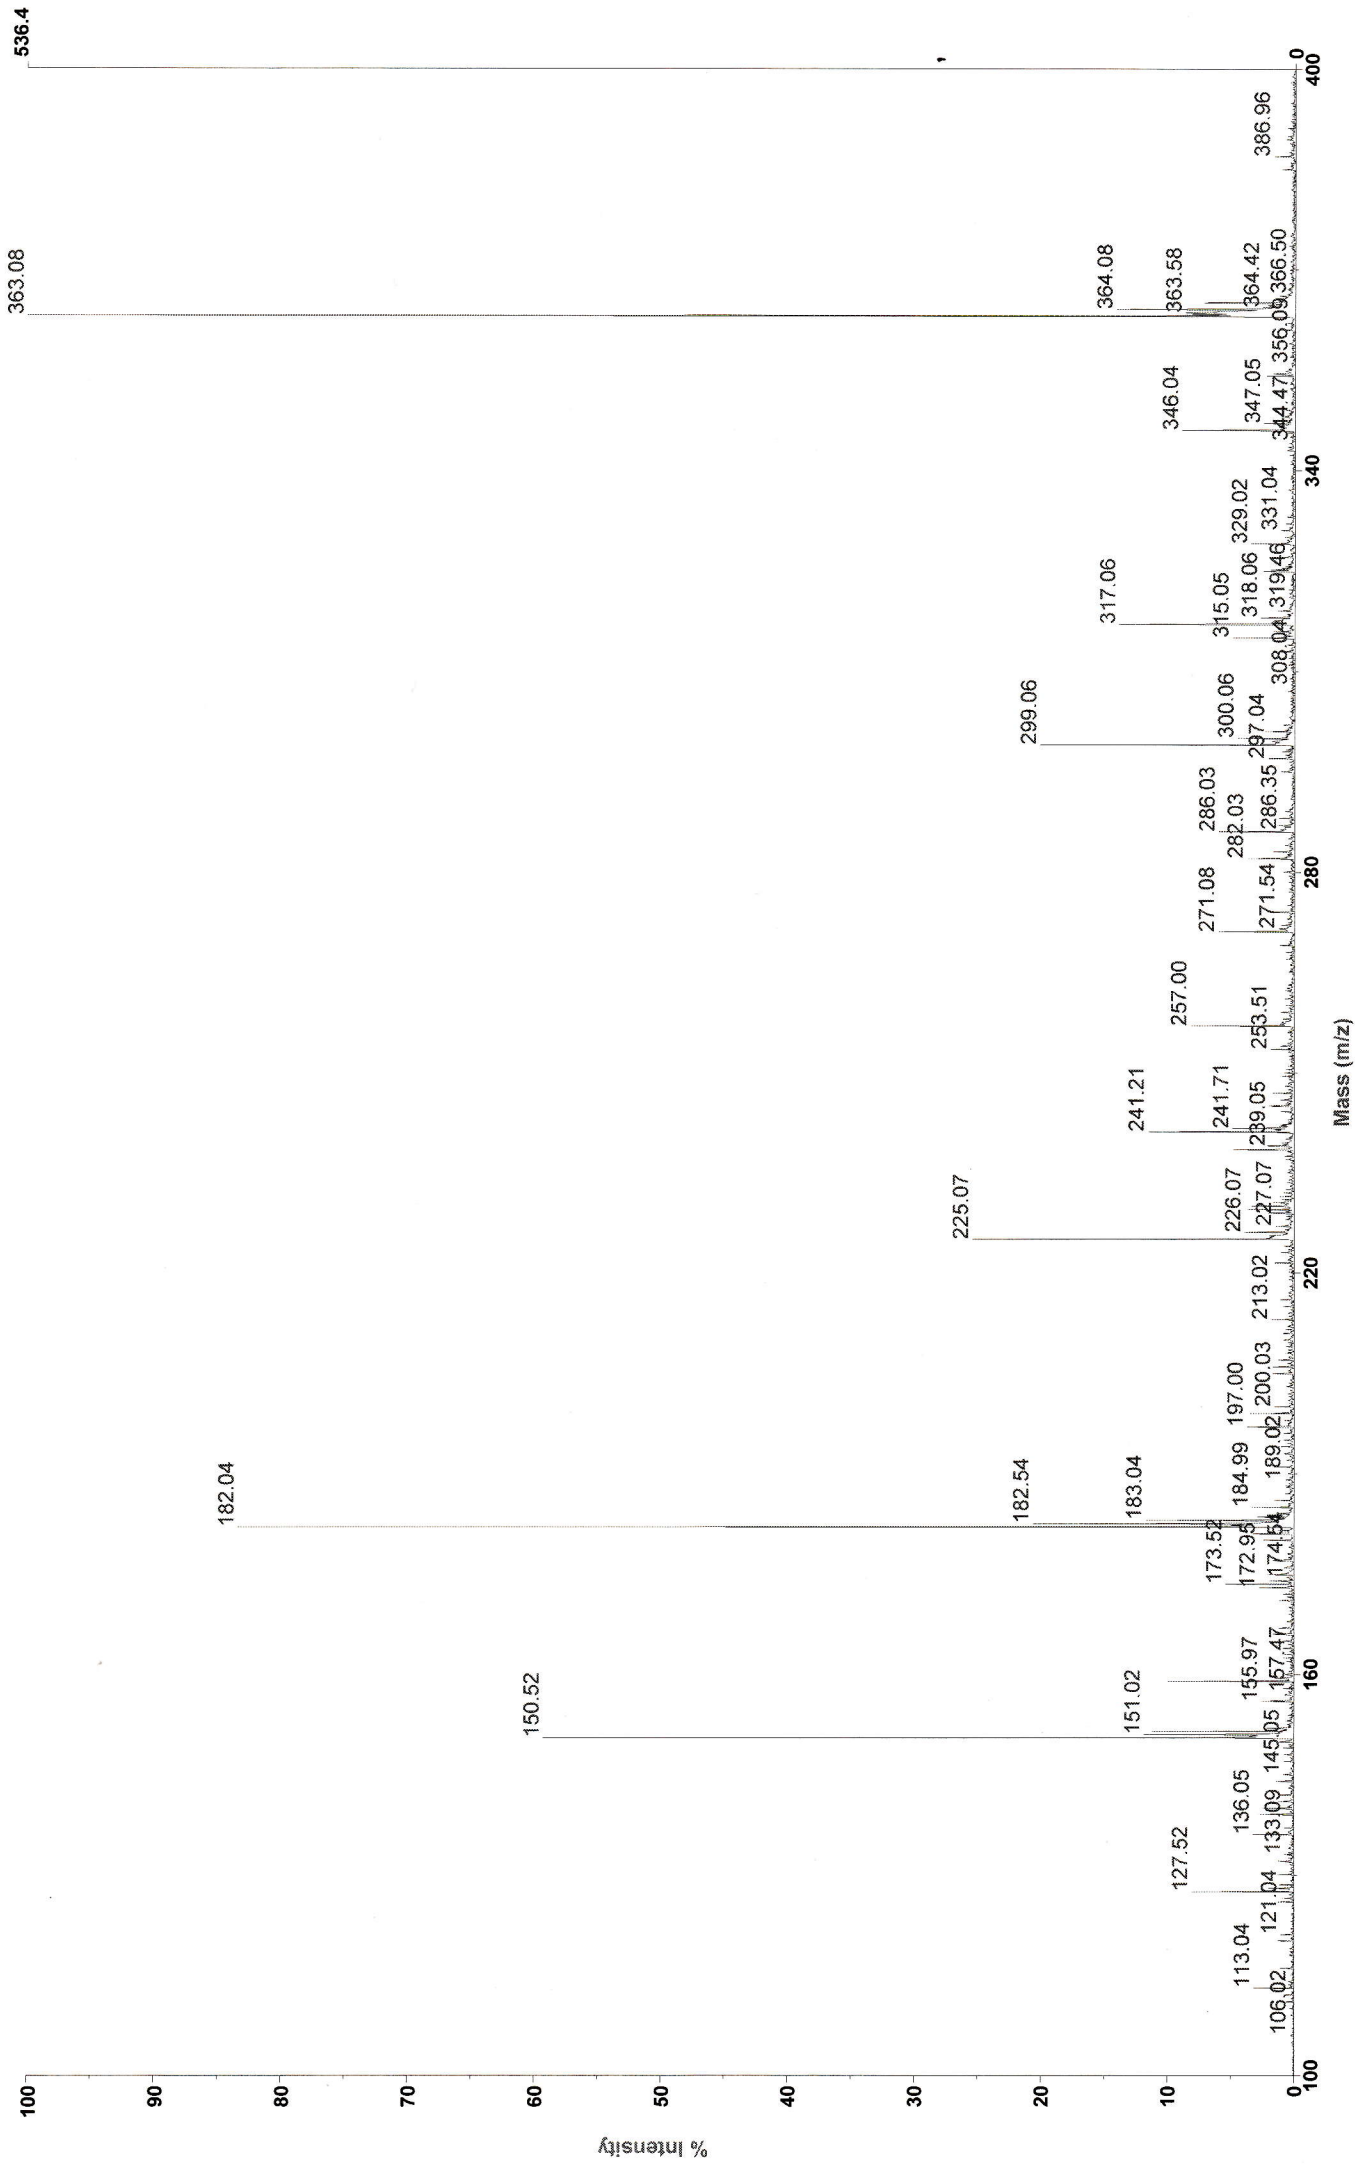

10 uM, 40% MeCN-0.1% HCOOH  
D:\...15S-Cys-NA001.dat  
Acquired: Oct 24 19:01:00 2014

Fig. S6



CMT-DA (Synthetic compound)

Display Report

Analysis Info

Analysis Name D:\Chem32\DATA\bioact-objika\14102509.d  
 Method ojika.LC.m  
 Sample Name b-CMT-DA\_std  
 Comment sample#1, 1 µL of 100 times dil, 10% MeOH-0.1% HCOOH, ODS (2\*75mm)

Acquisition Date 10/25/2014 19:59:40

Operator HCT-Plus  
 Instrument HCTUltra

Acquisition Parameter

|                   |            |              |           |                          |         |
|-------------------|------------|--------------|-----------|--------------------------|---------|
| Ion Source Type   | ESI        | Ion Polarity | Positive  | Alternating Ion Polarity | off     |
| Mass Range Mode   | Ultra Scan | Scan Begin   | 50 m/z    | Scan End                 | 400 m/z |
| Capillary Exit    | 106.0 Volt | Skimmer      | 40.0 Volt | Trap Drive               | 38.5    |
| Accumulation Time | 5286 aēs   | Averages     | 8 Spectra | Auto MS/MS               | off     |

| #    | RT [min] | Area       |
|------|----------|------------|
| 1    | 4.5      | 63237079 ← |
| n.a. | 4.5      | n.a.       |

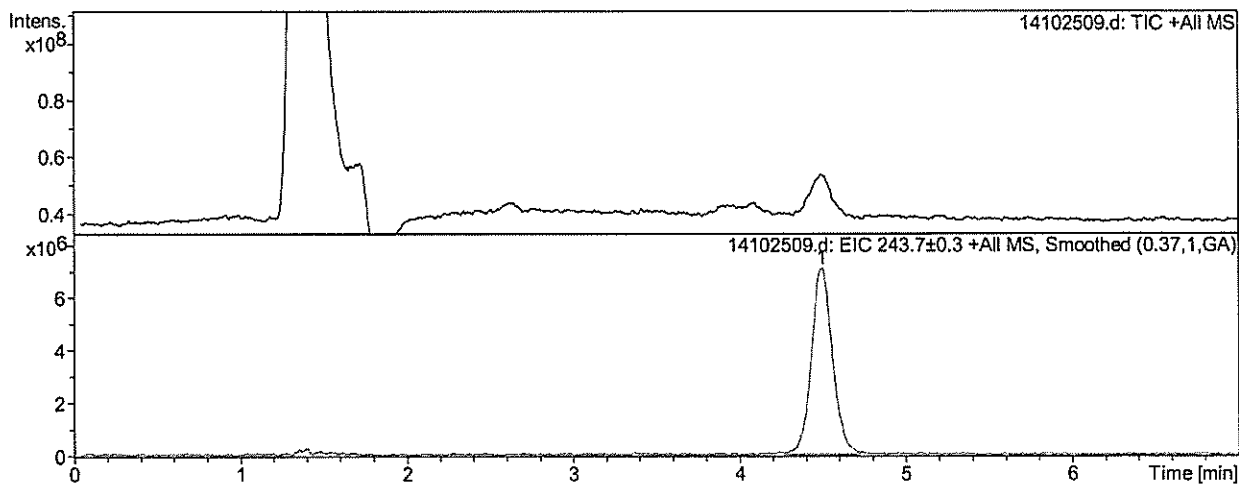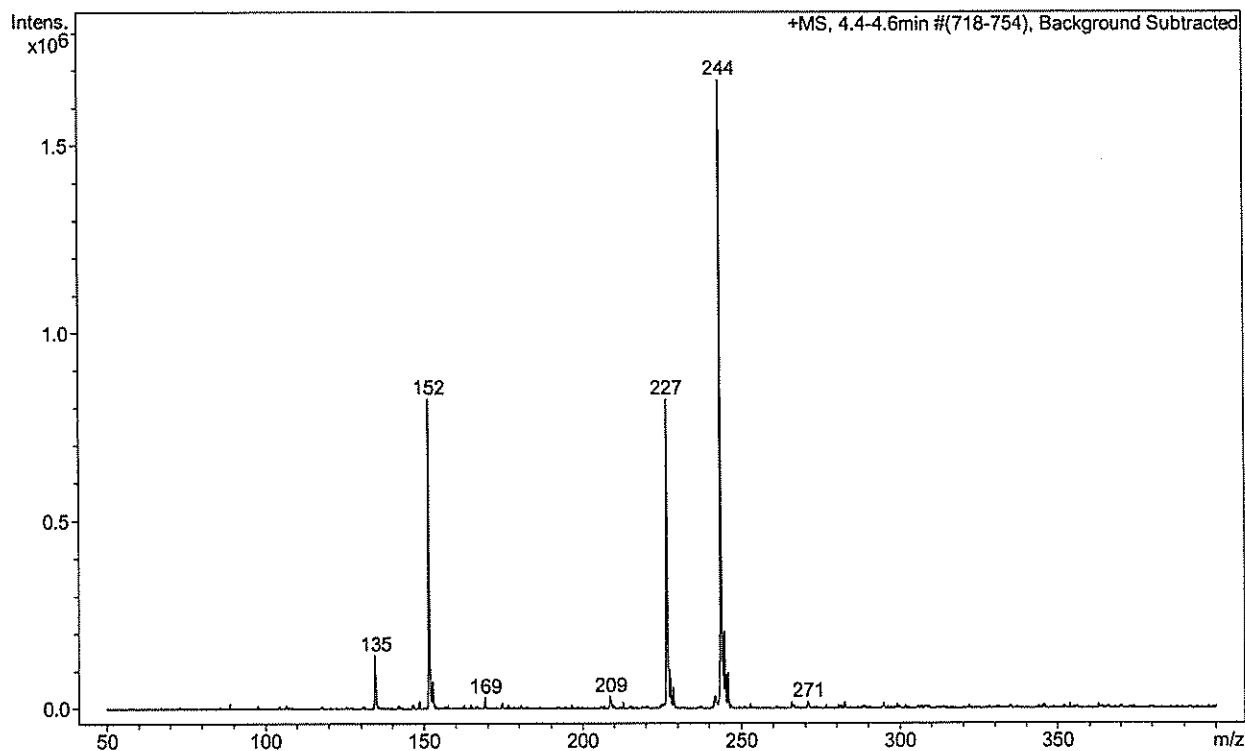

Fig. S7

Display Report

Analysis Info Acquisition Date 10/25/2014 19:47:26  
 Analysis Name D:\Chem32\DATA\bioact-ojika\14102508.d  
 Method ojikaLC.m Operator HCT-Plus  
 Sample Name LC-NM Instrument HCTultra  
 Comment Sample 2 µl injection 10% MeOH-0.1% HCOOH, ODS (2\*75mm)

Acquisition Parameter  
 Ion Source Type ESI Ion Polarity Positive Alternating Ion Polarity off  
 Mass Range Mode Ultra Scan Scan Begin 50 m/z Scan End 400 m/z  
 Capillary Exit 106.0 Volt Skimmer 40.0 Volt Trap Drive 38.5  
 Accumulation Time 7507 aes Averages 8 Spectra Auto MS/MS off

| #    | RT [min] | Area      |
|------|----------|-----------|
| 1    | 3.8      | 90039846  |
| 2    | 3.9      | 19849868  |
| 3    | 4.0      | 117001329 |
| 4    | 4.4      | 291970453 |
| n.a. | 4.4      | n.a.      |
| n.a. | 3.9      | n.a.      |

5-S-CYS-CMT-DA  
 ← CMT-DA

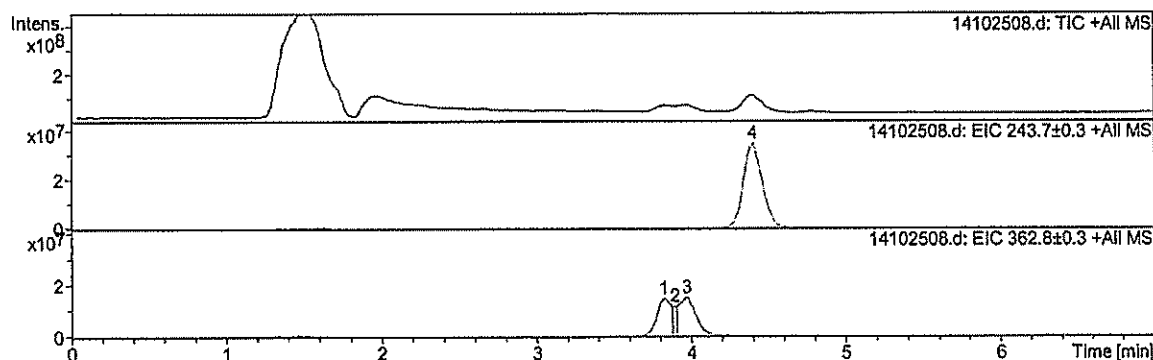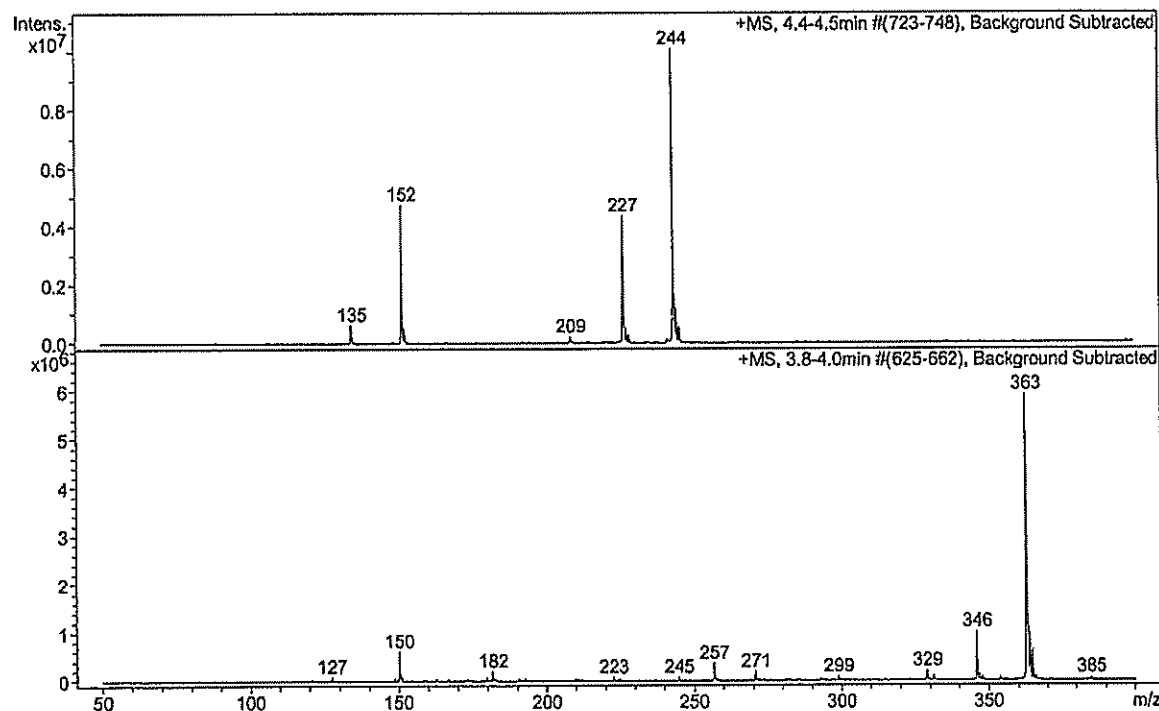

Fig. S8

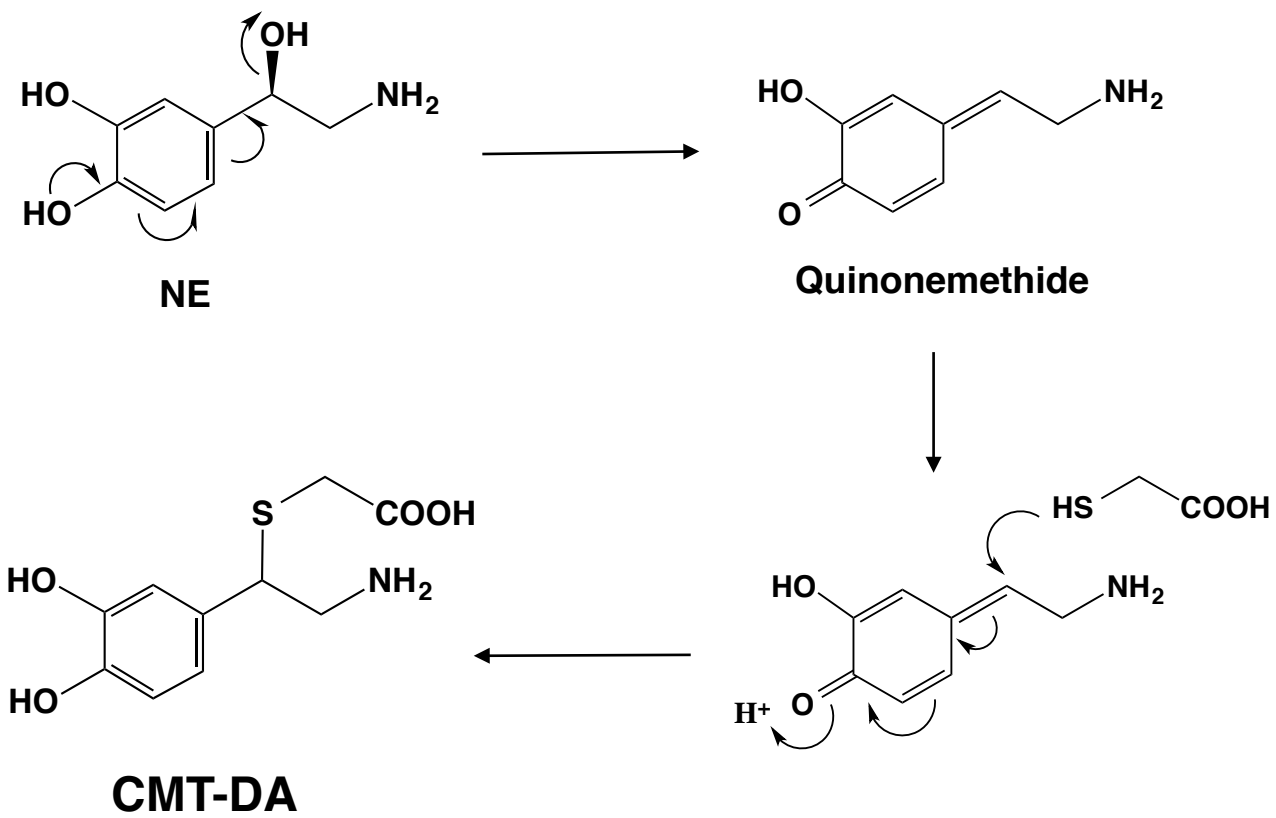

Fig. S9
